# Supplementary material
Source: MDPI journal article supplement (https://www.mdpi.com/2304-6732/11/1/49)
Supplement: s1 [file s1 › photonics-2765940-supplementary.pdf]

*Supplementary information*

# Non-invasive hemoglobin assessment with NIR imaging of blood vessels in the transmittance geometry: Monte Carlo and experimental evaluation

Ilia Bardadin<sup>1</sup>, Vladimir Petrov<sup>2</sup>, Georgy Denisenko<sup>2</sup>, Artashes Armaganov<sup>3</sup>, Anna Rubekina<sup>1</sup>, Daria Kopytina<sup>4</sup>, Vladimir Panov<sup>1</sup>, Petr Shatalov<sup>5</sup>, Victoria Khoronenko<sup>5</sup>, Petr Shegai<sup>5</sup>, Andrey Kaprin<sup>5</sup>, Andrey Shkoda<sup>6</sup> and Boris Yakimov<sup>1,2,6,\*</sup>

1 Faculty of Physics, M.V.Lomonosov Moscow State University, 1-2 Leninskie Gory, 119234 Moscow, Russia

2 Laboratory of Clinical Biophotonics, Biomedical Science and Technology Park, Sechenov First Moscow State Medical University, Trubetskaya 8, Moscow, 119048, Russia;

3 Medical Research and Education Center, M.V. Lomonosov Moscow State University, 119991 Moscow, Russia

4 Endocrinology Research Center, Dmitriya Ulianova Street, 11, 117036 Moscow, Russia

5 FSBI "National Medical Research Radiological Centre" (NMRRRC) of the Ministry of Health of the Russian Federation, Moscow, 2nd Botkinsky proezd, 3, 125284

6 Moscow State Budgetary Institution of Healthcare "L.A. Vorobiov City Clinical Hospital No. 67 MHD", Moscow, Salama Adil str., 2/44, 123423, Russia

\* Correspondence: bp.yakimov@physics.msu.ru;

Table S1 – Summary table for patients involved in study by gender, age, and hemoglobin level assessed invasively using a reference method and using a non-invasive optical method.

| Patient ID | Patient sex | Full age, years | Hb level, g/L<br>(invasive) | Hb level, g/L<br>(non-invasive) |
|------------|-------------|-----------------|-----------------------------|---------------------------------|
| Patient 1  | Male        | 23              | 93                          | 117.0                           |
| Patient 2  | Female      | 60              | 103                         | 125.14                          |
| Patient 3  | Female      | 24              | 117                         | 107.3                           |
| Patient 4  | Male        | 25              | 133                         | 137.3                           |
| Patient 5  | Female      | 29              | 136                         | 114.2                           |
| Patient 6  | Female      | 44              | 144                         | 141.4                           |
| Patient 7  | Female      | 24              | 105                         | 136.9                           |
| Patient 8  | Male        | 20              | 146                         | 149.9                           |
| Patient 9  | Female      | 29              | 116                         | 146.6                           |
